# Supplementary material for: Development of a highly pulmonary metastatic orthotopic renal cell carcinoma murine model
Source: PubMed Central journal article supplement (PMC8084570; doi:10.1242/bio.058566), 2021-04-20
Supplement: biolopen-10-058566-s1.pdf [file biolopen-10-058566-s1.pdf]

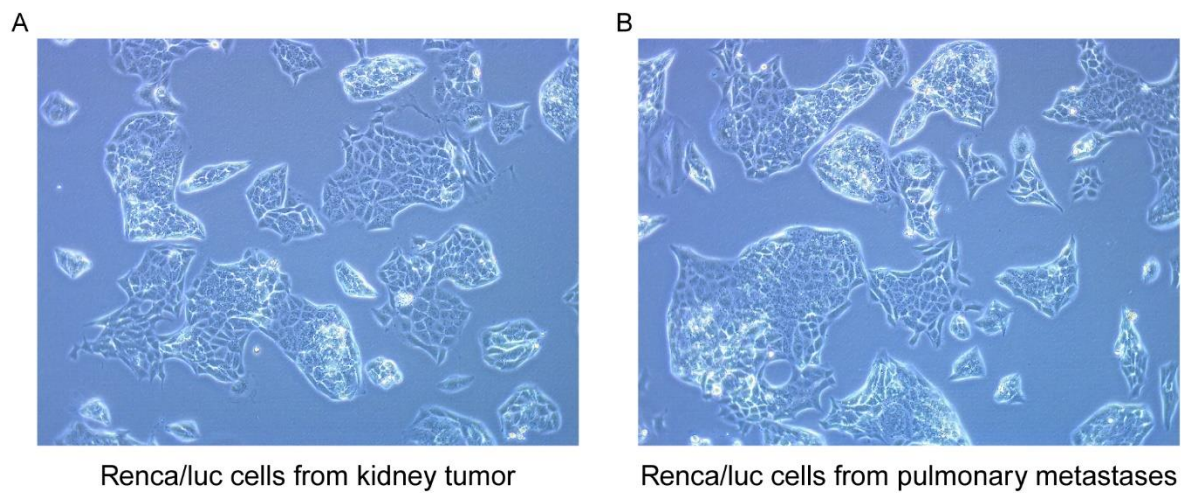

**Figure S1. Cell morphology of Renca/luc cells** **A.** Cells from kidney tumors. **B.** Cells from pulmonary metastases

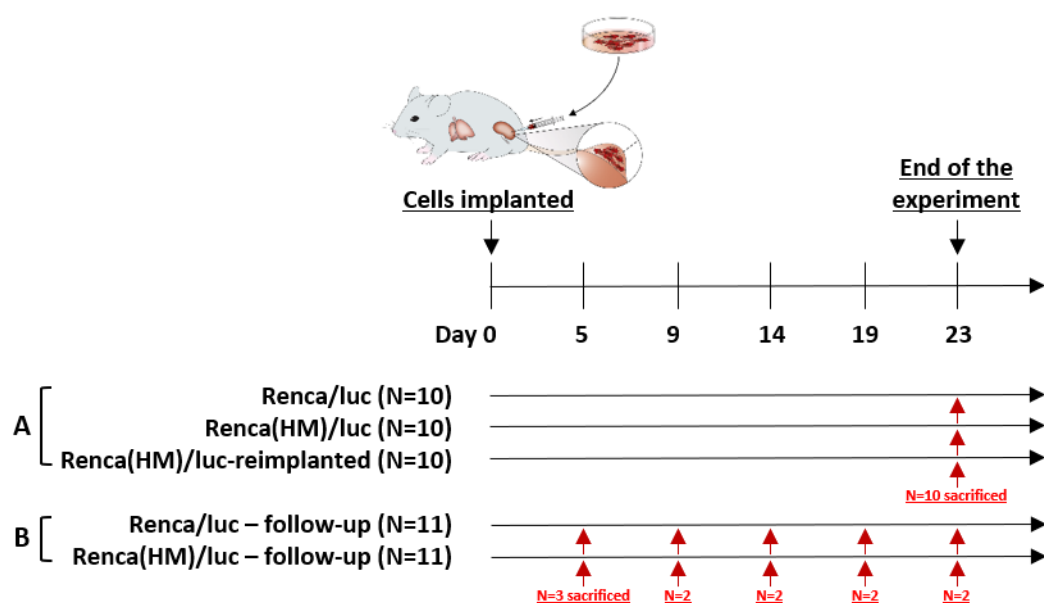

**Figure S2. Schematic representation of mice groups used in this study** **A.** 3 groups of mice sacrificed until the end of the study (n=10 for Renca/luc, Renca(HM)/luc, and Renca(HM)/luc-reimplanted, respectively). **B.** 2 groups of mice sacrificed with each time points to measure the tendency (2 mice sacrificed for each day 9, 14, 19, and 23 post-implantation and 3 mice sacrificed for day 5, total n=11 for Renca/luc and Renca(HM)/luc, respectively)
